# Supplementary material for: FOXO4 expression is related to stem cell-like properties and resistance to treatment in diffuse large B-cell lymphoma
Source: PubMed Central journal article supplement (PMC5356816; doi:10.18632/oncotarget.13690), 2016-11-29
Supplement: oncotarget-08-2466-s001.pdf [file oncotarget-08-2466-s001.pdf]

## Forkhead box O4 expression is related to stem cell-like properties and resistance to treatment in diffuse large B-cell lymphoma

### Supplementary Materials

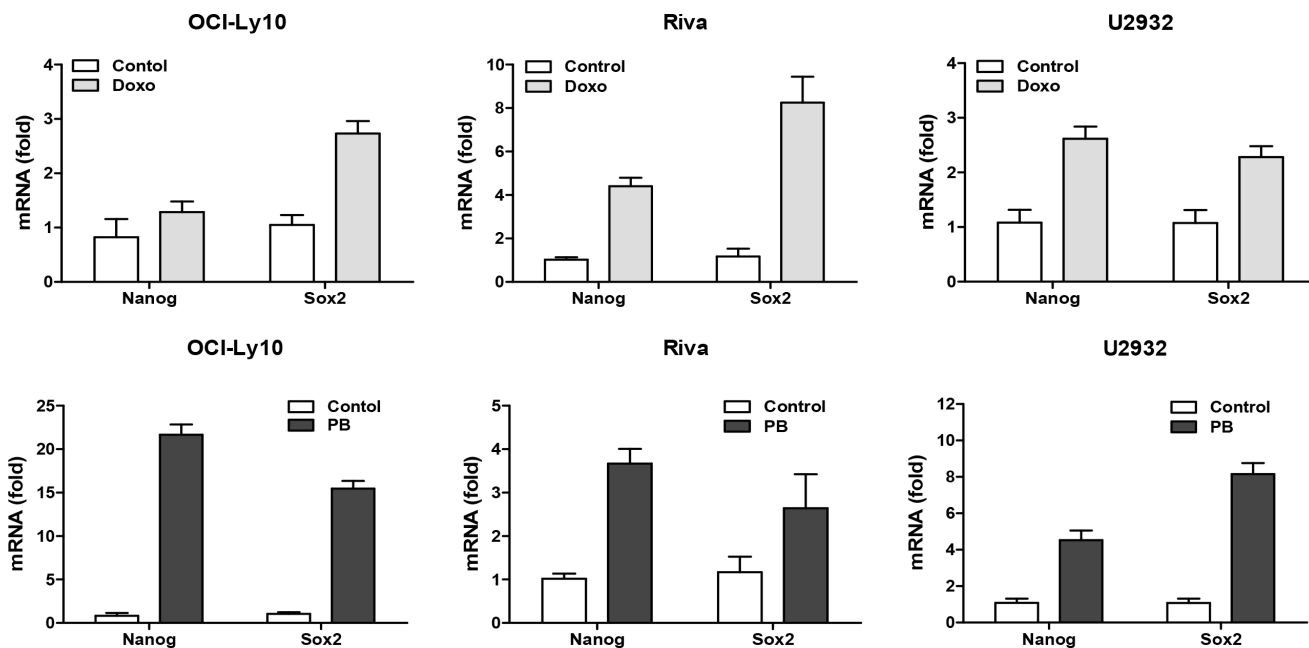

Supplementary Figure S1: The mRNA expression of Nanog and SOX2 is increased in surviving cells after IC90 treatment with doxorubicin and phenylbutyrate compared to control cells in other B-cell lymphoma cell lines (OCI-Ly10, Riva, U2932).

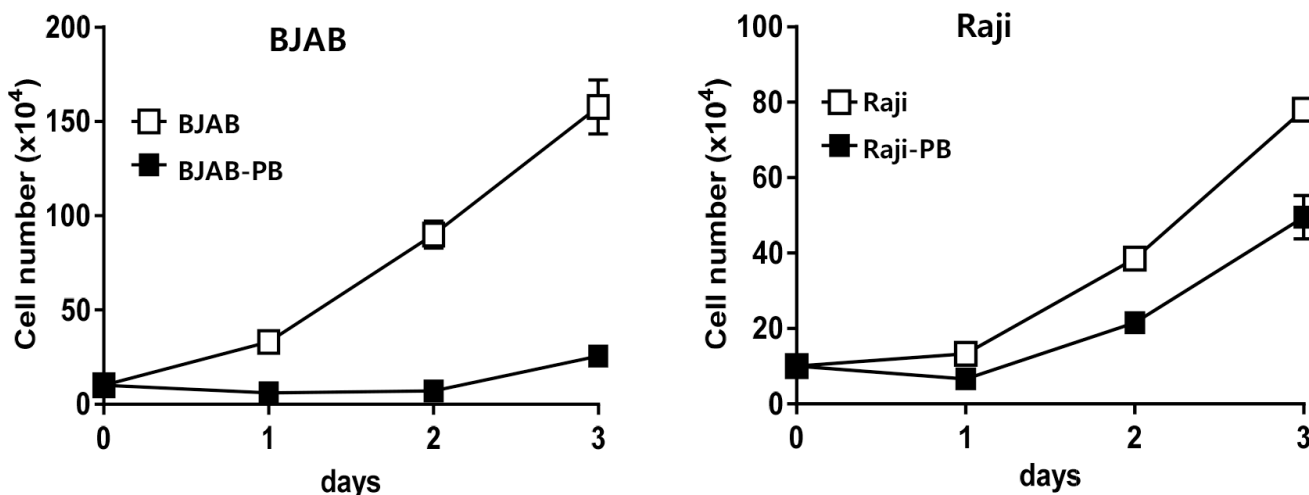

Supplementary Figure S2: Cell growth kinetics of non-treated and treatment-surviving cells. The values represent means  $\pm$  SD of three independent experiments. After treatment with phenylbutyrate (8 mM) for 48 h, surviving live cells are sorted via flow cytometry and cultured. Cell growth is monitored every 24 h for 3 days. The cell number is assessed based on trypan blue staining. Data represent means  $\pm$  SD.

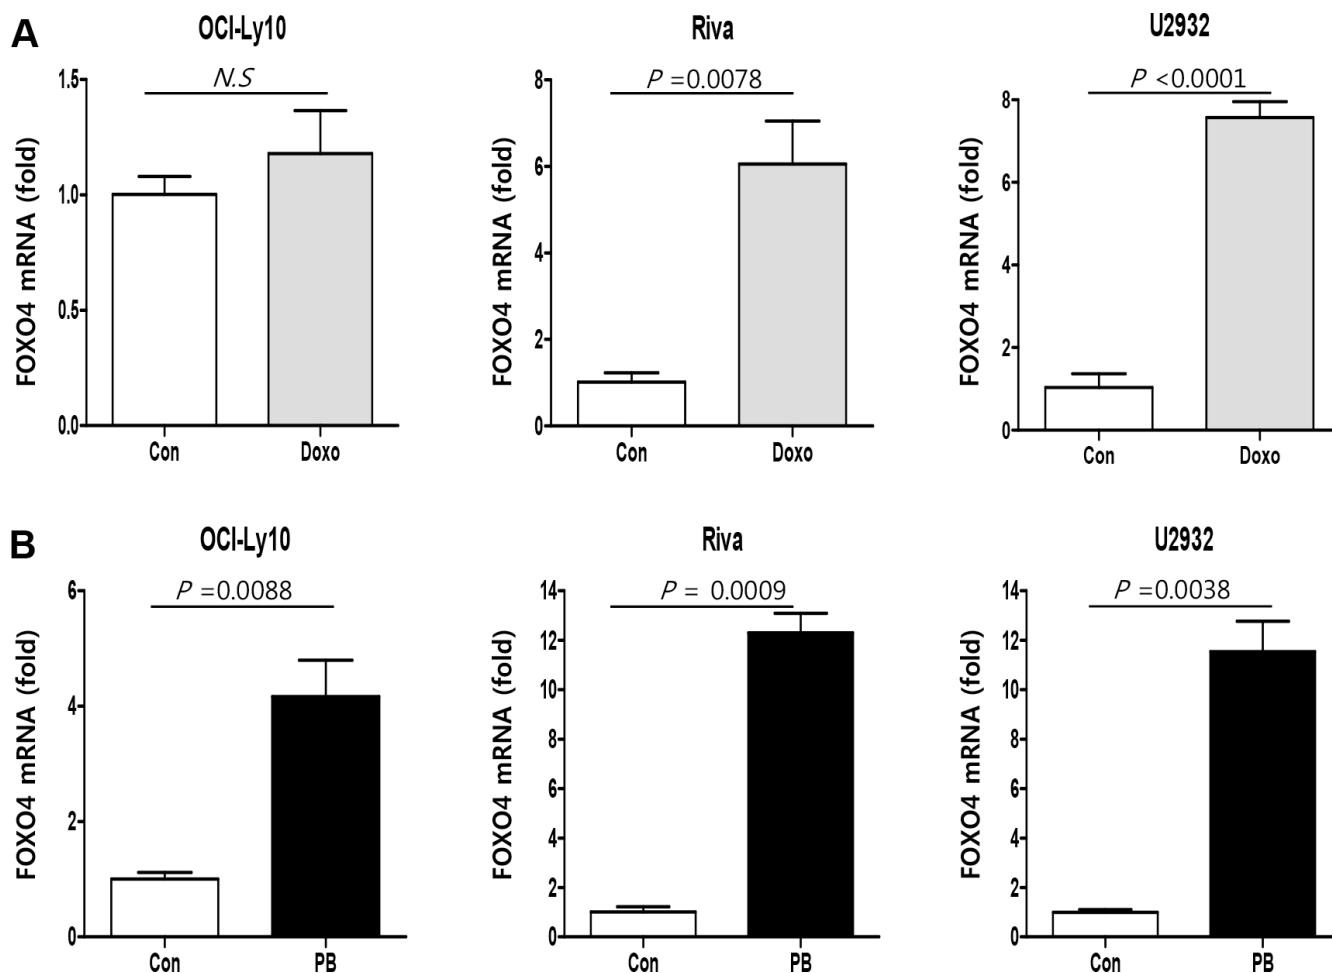

**Supplementary Figure S3: FOXO4 mRNA levels are upregulated in treatment-surviving B cell lymphoma cells.** (A) OCI-Ly10 cells are treated with doxorubicin (300 nM) for 48 h, and Riva and U2932 cells treated with Doxorubicin (3  $\mu$ M) for 72 h. (B) Phenylbutyrate (8 mM) treatment is performed for 24 h. Non-treated cells (control) and respective treatment-surviving cells are collected and FOXO4 mRNA expression evaluated using RT-qPCR. Data represent means  $\pm$  SEM of three independent experiments.

**Supplementary Table S1: Proportion of viable cells after treatment with doxorubicin or phenylbutyrate**

| Cell line | Doxorubicin       | Phenylbutyrate    |
|-----------|-------------------|-------------------|
| BJAB      | 9.48 $\pm$ 2.37%  | 10.28 $\pm$ 1.87% |
| Raji      | 7.45 $\pm$ 3.77%  | 6.54 $\pm$ 2.22%  |
| Daudi     | 6.15 $\pm$ 0.93%  | 15.57 $\pm$ 0.93% |
| Toledo    | 9.61 $\pm$ 5.12%  | 6.32 $\pm$ 1.47%  |
| OCI-Ly10  | 10.75 $\pm$ 1.95% | 8.6 $\pm$ 3.35%   |
| Riva      | 10.49 $\pm$ 0.17% | 6.13 $\pm$ 1.64%  |
| U2932     | 10.12 $\pm$ 3.00% | 6.43 $\pm$ 1.48%  |

**Supplementary Table S2: Commonly upregulated genes in treatment-surviving cells**

| <b>Gene Symbol</b> | <b>Gene Title</b>                            | <b>Gene Symbol</b> | <b>Gene Title</b>                    |
|--------------------|----------------------------------------------|--------------------|--------------------------------------|
| <i>ACTA2</i>       | smooth muscle aortic alpha-actin             | <i>HLA-H</i>       | MHC complex, class I, H              |
| <i>APOBEC3F</i>    | Apolipoprotein B mRNA editing enzyme         | <i>ID2</i>         | Inhibitor of DNA binding 2           |
| <i>C9orf9</i>      | Chromosome 9 open reading frame 95           | <i>IFI6</i>        | Interferon alpha-inducible protein 6 |
| <i>CCR7</i>        | Chemokine receptor 7                         | <i>JUN</i>         | Jun proto-oncogene                   |
| <i>CDKN1A</i>      | Cyclin-dependent kinase inhibitor 1A         | <i>KLF6</i>        | Kruppel-like factor 6                |
| <i>COL9A2</i>      | Collagen, type IX, alpha 2                   | <i>LOC727820</i>   | Hypothetical protein                 |
| <i>DUSP1</i>       | Dual-specificity phosphatase 1               | <i>MX1</i>         | Myxovirus resistance 1               |
| <i>EPSTI1</i>      | Epithelial-stromal interaction1              | <i>MXD4</i>        | MAX dimerization protein 4           |
| <b>FOXO4</b>       | Forkhead box O4                              | <i>N4BP2L1</i>     | EDD4 binding protein 2-like 1        |
| <i>GNS</i>         | Glucosamine N-acetyl-6-sulfatase             | <i>NEU1</i>        | Neuraminidase 1                      |
| <i>HCP5</i>        | HLA complex P5                               | <i>NPC2</i>        | Niemann-Pick disease, type C2        |
| <i>HIST1H1C</i>    | Histone cluster 1, H1c                       | <i>OAS2</i>        | Oligoadenylate synthetase 2          |
| <i>HIST1H2A</i>    | Histone cluster 1, H2ac                      | <i>OPTN</i>        | Optineurin                           |
| <i>HIST1H2BD</i>   | Histone cluster 1, H2b                       | <i>PRIC285</i>     | PPARa interacting complex 285        |
| <i>HIST1H2BK</i>   | Histone cluster 1, H2bk                      | <i>PSAP</i>        | Prosaposin                           |
| <i>HIST1H4H</i>    | Histone cluster 1, H4h                       | <i>STAT2</i>       | STAT2                                |
| <i>HIST2H2AA3</i>  | Histone cluster 2, H2aa3                     | <i>TCTN1</i>       | Tectonic family member 1             |
| <i>HIST2H2BE</i>   | Histone cluster 2, H2be                      | <i>TP53INP1</i>    | TP53 inducible nuclear protein 1     |
| <i>HLA-A</i>       | MHC class I, A                               | <i>TSGA10</i>      | Testis specific, 10                  |
| <i>HLA-B</i>       | MHC class I, B                               | <i>YPEL5</i>       | Yippee-like 5                        |
| <i>HLA-F</i>       | Major histocompatibility complex, class I, F |                    |                                      |
